# Supplementary material
Source: PubMed Central journal article supplement (PMC9933929)
Supplement: NEJMc2215471_disclosures.pdf [file NEJMc2215471_disclosures.pdf]

Discloser Identifier: 1051700

Disclosure Purpose: 22-15471

## Summary of Interests

### Company or Organization

| Entity                                                                                                     | Type             | Interest Held By                                                                |
|------------------------------------------------------------------------------------------------------------|------------------|---------------------------------------------------------------------------------|
| National Institute of Health                                                                               | Grant / Contract | Self                                                                            |
| <i>Recipient Name:</i> Yu Gu<br><i>Grant / Contract Description:</i> R01<br><i>Additional Information:</i> |                  | <i>Recipient Type:</i> Institution<br><i>Grant / Contract Purpose:</i> Research |

## Additional Questions

1. **Are there other relationships or activities that readers could perceive to have influenced, or that give the appearance of potentially influencing, what you wrote in the submitted work?**

No.

2. **What is the manuscript title?**

Effectiveness of Bivalent Boosters Against Severe Omicron Infection

3. **Are you the corresponding author?**

No.

## Certification

I certify that the information provided in this disclosure is complete and accurate.

Discloser Identifier: 579736

Disclosure Purpose: 22-15471

## Summary of Interests

### Company or Organization

| Entity                                                                                                                                                   | Type             | Interest Held By |
|----------------------------------------------------------------------------------------------------------------------------------------------------------|------------------|------------------|
| Dennis Gillings Distinguished Professorship                                                                                                              | Gift             | Self             |
| <i>Description:</i> Endowment of a professorship in Biostatistics by Dr. Dennis Gillings<br><i>Additional Information:</i>                               |                  |                  |
| National Institutes of Health                                                                                                                            | Grant / Contract | Self             |
| <i>Recipient Name:</i> Dan-Yu Lin<br><i>Grant / Contract Description:</i> Semiparametric Analysis of Big Censored Data<br><i>Additional Information:</i> |                  |                  |
| <i>Recipient Type:</i> Institution<br><i>Grant / Contract Purpose:</i> Research                                                                          |                  |                  |
| National Institutes of Health                                                                                                                            | Grant / Contract | Self             |
| <i>Recipient Name:</i> Dan-Yu Lin<br><i>Grant / Contract Description:</i> Statistical Issues in HIV/AIDS Research<br><i>Additional Information:</i>      |                  |                  |
| <i>Recipient Type:</i> Institution<br><i>Grant / Contract Purpose:</i> Research                                                                          |                  |                  |

## Additional Questions

1. **Are there other relationships or activities that readers could perceive to have influenced, or that give the appearance of potentially influencing, what you wrote in the submitted work?**

No.

2. **What is the manuscript title?**

Effectiveness of Bivalent Boosters Against Severe Omicron Infection

3. **Are you the corresponding author?**

Yes.

a. **Please list the other authors' names here.**

Yangjianchen Xu Yu Gu Donglin Zeng Bradford Wheeler Hayley Young Shadia Khan Sunny Zack Moore

## Certification

I certify that the information provided in this disclosure is complete and accurate.



**Discloser Identifier:** 447083

**Disclosure Purpose:** 22-15471

## Summary of Interests

I do not have any interests to disclose at this time.

## Additional Questions

1. **Are there other relationships or activities that readers could perceive to have influenced, or that give the appearance of potentially influencing, what you wrote in the submitted work?**

No.

2. **What is the manuscript title?**

Effectiveness of Bivalent Booster Against Severe Omicron Infection

3. **Are you the corresponding author?**

No.

## Certification

I certify that the information provided in this disclosure is complete and accurate.

Shadia Khan Sunny

**Discloser Identifier:** 1051705

**Disclosure Purpose:** 22-15471

## Summary of Interests

I do not have any interests to disclose at this time.

## Additional Questions

1. **Are there other relationships or activities that readers could perceive to have influenced, or that give the appearance of potentially influencing, what you wrote in the submitted work?**

No.

2. **What is the manuscript title?**

Effectiveness of Bivalent Boosters Against Severe Omicron Infection

3. **Are you the corresponding author?**

No.

## Certification

I certify that the information provided in this disclosure is complete and accurate.

Bradford Wheeler

**Discloser Identifier:** 1051703

**Disclosure Purpose:** 22-15471

## Summary of Interests

I do not have any interests to disclose at this time.

## Additional Questions

1. **Are there other relationships or activities that readers could perceive to have influenced, or that give the appearance of potentially influencing, what you wrote in the submitted work?**

No.

2. **What is the manuscript title?**

Effectiveness of Bivalent Boosters Against Severe Omicron Infection

3. **Are you the corresponding author?**

No.

## Certification

I certify that the information provided in this disclosure is complete and accurate.

**Discloser Identifier:** 1084290

**Disclosure Purpose:** 22-15471

## Summary of Interests

I do not have any interests to disclose at this time.

## Additional Questions

1. **Are there other relationships or activities that readers could perceive to have influenced, or that give the appearance of potentially influencing, what you wrote in the submitted work?**

No.

2. **What is the manuscript title?**

Effectiveness of Bivalent Boosters Against Severe Omicron Infection

3. **Are you the corresponding author?**

No.

## Certification

I certify that the information provided in this disclosure is complete and accurate.

Hayley Young

**Discloser Identifier:** 1051704

**Disclosure Purpose:** 22-15471

## Summary of Interests

I do not have any interests to disclose at this time.

## Additional Questions

1. **Are there other relationships or activities that readers could perceive to have influenced, or that give the appearance of potentially influencing, what you wrote in the submitted work?**

No.

2. **What is the manuscript title?**

Effectiveness of Bivalent Boosters Against Severe Omicron Infection

3. **Are you the corresponding author?**

No.

## Certification

I certify that the information provided in this disclosure is complete and accurate.



Discloser Identifier: 547447

Disclosure Purpose: 22-15471

## Summary of Interests

### Company or Organization

| Entity                                                                                                                                                                                                                                                                                                                         | Type             | Interest Held By |
|--------------------------------------------------------------------------------------------------------------------------------------------------------------------------------------------------------------------------------------------------------------------------------------------------------------------------------|------------------|------------------|
| Foundation for the National Institutes of Health                                                                                                                                                                                                                                                                               | Grant / Contract | Self             |
| <i>Recipient Name:</i> Donglin Zeng <span style="float: right;"><i>Recipient Type:</i> Individual</span><br><i>Grant / Contract Description:</i> The research is partially supported by NIH grant R01-GM124104. <span style="float: right;"><i>Grant / Contract Purpose:</i> Research</span><br><i>Additional Information:</i> |                  |                  |

## Additional Questions

1. **Are there other relationships or activities that readers could perceive to have influenced, or that give the appearance of potentially influencing, what you wrote in the submitted work?**

No.

2. **What is the manuscript title?**

Effectiveness of Bivalent Boosters Against Severe Omicron Infection

3. **Are you the corresponding author?**

No.

## Certification

I certify that the information provided in this disclosure is complete and accurate.
